# Supplementary material for: Potential Contribution of Phenotypically Modulated Smooth Muscle Cells and Related Inflammation in the Development of Experimental Obstructive Pulmonary Vasculopathy in Rats
Source: PubMed Central journal article supplement (PMC4340876; doi:10.1371/journal.pone.0118655), 2015-02-25
Supplement: pone.0118655.s002.pdf [file pone.0118655.s002.pdf]

Table S2. Number of animals used for each group in Figure 1A

|         | Weeks after treatment* | n** |
|---------|------------------------|-----|
| SuHx    | 0-3                    | 28  |
|         | 4-5                    | 22  |
|         | 6-8                    | 16  |
|         | 9-13                   | 8   |
| Hypoxia | 0-3                    | 10  |
|         | 4-5                    | 5   |
| Control | 0-3                    | 10  |
|         | 4-5                    | 5   |

Definition of abbreviations: SuHx = Sugden/hypoxia.

\* Weeks after treatment: Sugden or diluent treatment.

\*\*n: number of rats.
